# Supplementary material for: Point-of-care ultrasound (POCUS) use in mountain emergency medicine: results from an international online survey
Source: Research Square preprint supplement (doi:10.21203/rs.3.rs-7284526/v1), 2025-08-12
Supplement: Supplementary file 1 [file 43f35e58a2287cbc8e85a70b.docx]

**Checklist for Reporting Results of Internet E-Surveys (CHERRIES)**

| **Checklist Item** | **Explanation** |
| --- | --- |
| Describe survey design | An online survey lasting 5-10 minutes was sent to representatives of mountain rescue organizations who are active members of the medical commission (MEDCOM) of the International Commission for Alpine Rescue (ICAR). |
| IRB approval | An exemption from ethical board approval was obtained through the Swiss Association of Research Ethics Committees (swissethics). |
| Informed consent | We provided an introduction text to the survey on the online web application. This section included information on the investigators, the selected participants, and the objective of the survey. |
| Data protection | No health-related personal data was collected. |
| Development and testing | The survey was drafted and reviewed by a committee of seven international experts in mountain rescue and mountain emergency medicine. All contributing experts were active members of the ICAR MEDCOM. The survey was tested by 3 external physicians, who were experienced in mountain rescue but not involved with the ICAR MEDCOM or the development of the survey. |
| Open survey versus closed survey | This was a closed survey, as participants were invited to participate from within the ICAR MEDCOM. Access to the survey was not password protected but the researchers applied stringent exclusion criteria. |
| Contact mode | Invitations to participate in the survey were sent out via e-mail. Two reminders were also sent via e-mail. In addition, ICAR MEDCOM representatives of the selected organizations were invited to participate during the annual ICAR congress. |
| Advertising the survey | We did not advertise the survey. |
| Web/E-mail | The survey data were collected using the REDCap (Research Electronic Data Capture) web application hosted by the Department of Clinical Research of the University of Bern in Switzerland. |
| Context | REDCap is a secure, web-based software platform designed to support data capture for research studies. |
| Mandatory/voluntary | Participation in the survey was voluntary. |
| Incentives | There were no incentives offered for participation in the survey. |
| Time/Date | The survey was available online from August 8 to November 31, 2024. |
| Randomization of items or questionnaires | There was no randomization of items within the survey. |
| Adaptive questioning | The survey was divided into 4 sections. The first section of the survey aimed to collect operational and staffing information about the participating rescue organization. This section was available to all participants. Only if the participant indicated that their organization used POCUS did the remaining sections become available for answering. Within these sections, further adaptive questioning was used to reduce the number of questions for each participant. |
| Number of items | The number of survey items per section ranged from 4 to 14. The total number of items was 40. |
| Number of screens (pages) | The first section of the survey was contained in one screen, which expanded if the remaining sections became available to the participant. |
| Completeness check | All submissions were checked for completeness before being included in the final analysis. All questions had a non-response option. |
| Review step | Respondents were able to review and change their answers before submission. |
| Unique site visitor | We did not collect data to determine unique site visitors. |
| View rate (Ratio of unique survey visitors/unique site visitors) | We did not provide a view rate for this survey. |
| Participation rate (Ratio of unique visitors who agreed to participate/unique first survey page visitors) | We did not provide a participation rate for this survey. |
| Completion rate (Ratio of users who finished the survey/users who agreed to participate) | We did not provide a completion rate as the survey was contained within one screen. |
| Cookies used | We did not collect any cookies to assign a unique user identifier to each client computer. |
| IP check | We did not collect any IP addresses to identify duplicate entries from the same user. |
| Log file analysis | Each participant was asked to list their respective rescue organization in the survey to exclude duplicate entries from the same rescue organization. Only the first answer submitted by the rescue organization was included in the final analysis. |
| Registration | There was no registration required. |
| Handling of incomplete questionnaires | Only completed submissions were analyzed. |
| Questionnaires submitted with an atypical timestamp | We did not measure the time needed to fill in the survey. |
| Statistical correction | We did not use statistical correction methods. |

This checklist has been modified from Eysenbach G. Improving the quality of Web surveys: the Checklist for Reporting Results of Internet E-Surveys (CHERRIES). J Med Internet Res. 2004;6(3):e34.
