# Supplementary material for: Point-of-care ultrasound (POCUS) use in mountain emergency medicine: results from an international online survey
Source: Research Square preprint supplement (doi:10.21203/rs.3.rs-7284526/v1), 2025-08-12
Supplement: Supplementary file 2 [file 50b122a493ed81f34d9d20d8.docx]

**Point-of-care ultrasound (POCUS) use in mountain emergency medicine: results from an international online survey**

The objective of this survey is to better understand how POCUS is currently being used by international mountain rescue organizations to improve patient care in mountain emergency medicine. This survey will be sent to ICAR MEDCOM delegates of organizations who are active in mountain rescue. We hope to use the results of this survey to guide the development of future ICAR MEDCOM recommendations.

**Important: Please submit only one answer per rescue organization. Please complete the first part of the survey ("General Information") even if your organization does not use ultrasound. Some questions may have multiple answers.**

Thank you for your participation!

**General information**

1. What is the name of your rescue organization?

Please specify:

1. In which country is your rescue organization based?

Please specify:

1. Which type of service does your rescue organization provide?

Please note: Some mountain rescue organizations provide both helicopter and terrestrial rescues, whereas other organizations rely on external providers for helicopter pick-up.

- Helicopter emergency medical service (HEMS)
- Terrestrial rescue
- Both services

1. Is your rescue organization a voluntary or professional service?

Please note: There is large variability between international mountain rescue organizations regarding funding and remuneration. Voluntary services are staffed by volunteers who do not receive a salary. Professional services employ paid staff.

- Voluntary
- Professional
- Service with both voluntary and professional staff

1. Is your rescue organization physician staffed?

- Yes
- No
- Partly (a physician may or may not be present depending on availability)

1. Which other professions are part of your rescue organization? Multiple answers may apply.

- Nurse
- Paramedic (advanced life support provider)
- Emergency medical technician (basic life support provider)
- Mountain guide / rescue specialist (i.e. person with technical mountain rescue skills)
- Other – please specify:

1. Does your organization use ultrasound when providing patient care?

- Yes
- No

1. If you answered YES - when does your rescue organization perform POCUS?

- Never
- Always
- Occasionally (e.g. only HEMS or vehicle based, only for certain types of rescues, provider dependent). Please specify:

1. If you answered YES – for how many years has your rescue organization been providing POCUS?

- < 1 year
- 1 - 2 years
- 2 - 3 years
- > 3 years

1. If you answered NO – does your rescue organization plan to integrate POCUS in the future?

- Yes
- No

1. If the answer to the previous question was YES – when will you most likely introduce POCUS?

- < 1 year
- 1 - 2 years
- 3 - 4 years
- > 4 years

**Equipment**

1. Which ultrasound device does your organization use? Multiple answers may apply.

- Butterfly Network
- Clarius
- GE Healthcare Vscan
- Philips Lumify
- Sonosite iViz
- Other – please specify:

1. How satisfied are you with this/these device(s)?

Very dissatisfied – dissatisfied – neither – satisfied – very satisfied – do not know

1. If your device offers different probe types, which are used by your rescue organization? Multiple answers may apply.

- Linear probe
- Curvilinear probe
- Phased array probe

1. Are you aware of any technical issues that were encountered while using ultrasound devices during mountain rescue due to adverse weather conditions? Multiple answers may apply.

- Device malfunction due to cold
- Battery issues due to cold
- Display issues due to cold (e.g. touchscreen malfunction)
- Display issues due to light exposure (e.g. poor visibility of images in direct sunlight)
- Other – please specify:
- I do not know

**Importance and role of POCUS**

1. Who provides POCUS within your rescue organization? Multiple answers may apply.

- Physician
- Paramedic (advanced life support provider)
- Other – please specify:

1. How important is POCUS in daily practice in your rescue organization?

Not important – slightly important – moderately important – important – very important – do not know

1. In which type of patients do you think POCUS is most relevant to your rescue organization?

- Medical emergencies
- Traumatic emergencies
- Both medical and traumatic emergencies are equally relevant

1. In which areas is POCUS mainly used by your rescue organization? Multiple answers may apply.

- Abdomen
- Airway
- Echocardiography
- Lungs
- Neurology
- Vascular
- Other – please specify:

1. How relevant is POCUS for each area?

Not relevant – slightly relevant – moderately relevant – relevant – very relevant – do not know

1. In which clinical conditions is POCUS mainly used by your rescue organization? Multiple answers may apply.

- Acute abdomen
- Acute altitude illnesses (AMS / HACE / HAPE)
- Cardiac arrest
- Dyspnea
- Accidental hypothermia
- Non-traumatic shock
- Traumatic shock
- Other – please specify:

1. How relevant is POCUS for each clinical condition?

Not relevant – slightly relevant – moderately relevant – relevant – very relevant – do not know

1. Does your rescue organization use POCUS to guide procedures? Multiple answers may apply.

- IV access
- Regional anesthesia
- Pericardiocentesis
- Thoracocentesis
- Other procedures – please specify:

1. How relevant is POCUS for each procedure?

Not relevant – slightly relevant – moderately relevant – relevant – very relevant – do not know

1. In your rescue organization’s experience, does POCUS change the TREATMENT of your patients in the field?

- Yes
- No
- I do not know

1. If you answered YES – in how many of yourpatients did POCUS substantially change your treatment?

- <10% of patients
- 11-25% of patients
- 26-50% of patients
- 51-75% of patients
- 76-100% of patients
- I do not know

1. In your rescue organization’s experience, does POCUS affect the OUTCOME of your patients?

- Yes
- No
- I do not know

1. If you answered YES – in how many of your patients does POCUS substantially affect the outcome?

- <10% of patients
- 11-25% of patients
- 26-50% of patients
- 51-75% of patients
- 76-100% of patients
- I don’t know

1. Do you know how often POCUS is used by your rescue organization?

- <10% of patients
- 10-25% of patients
- 25-50% of patients
- 50-75% of patients
- 75-100% of patients
- I don’t know

**Quality and teaching**

1. Does your rescue organization use standardized ultrasound protocols for POCUS?

- Yes
- No
- I don’t know

1. If you answered YES – which protocols are used? Multiple answers may apply.

- BLUE
- eFAST
- FATE
- RUSH
- Other protocols – please specify:

1. How are POCUS findings recorded by your rescue organization? Multiple answers may apply.

- Video clips and /or images
- Electronic database
- Mission protocol / patient record
- I do not know
- Other ways of recording– please specify:

1. When are POCUS findings recorded by your organization?

- Always recorded if POCUS was performed
- Only recorded if POCUS findings were relevant
- Not recorded at all
- I do not know

1. If POCUS findings are NOT recorded, please mention why. Multiple answers may apply.

- No technical possibility
- Too expensive
- Time-consuming
- Other reasons – please specify:

1. Are the POCUS images and diagnoses made by your rescuers reviewed or quality-checked by internal or external experts?

- Yes
- No
- I do not know

1. Does your organization have access to telemedical assistance when providing POCUS in the field (e.g. real-time interpretation by a supervisor or a hospital-based physician)?

- Yes
- No
- I don’t know

1. Can the prehospital POCUS images be transferred to the in-hospital patient file or to a picture archiving and communication system (PACS)?

- Yes
- No
- I do not know

1. Is there a credentialing process for using POCUS within your rescue organization? Please note: A credentialing process means that only providers with certain prerequisites (e.g. previous POCUS training or diploma) are allowed to use POCUS.

- Yes
- No
- I don’t know

1. If you answered YES – what are the requirements for using POCUS? Multiple answers may apply.

- POCUS course offered by a national or international association
- Theoretical and/or practical exam
- Theoretical teaching within your own organization
- Practical training within your own organization
- Number of supervised cases. Please provide the number of cases:
- Other requirements – please specify:

1. If you answered YES - how many hours of training are required for using POCUS within your rescue organization?

- <10 hours
- 11-20 hours
- 21-30 hours
- 31-40 hours
- >40 hours
- I do not know

This survey has been adapted from Hilbert-Carius P, Struck MF, Rudolph M, Knapp J, Rognas L, Adler J, et al. Point-of-care ultrasound (POCUS) practices in the helicopter emergency medical services in Europe: results of an online survey. Scand J Trauma Resusc Emerg Med. 2021;29(1):124.
